# Supplementary material
Source: Springer Nature journal article supplement (https://www.springermedizin.de/resource/supplementary/12960_2013_348_MOESM3_ESM.pdf/9569894)

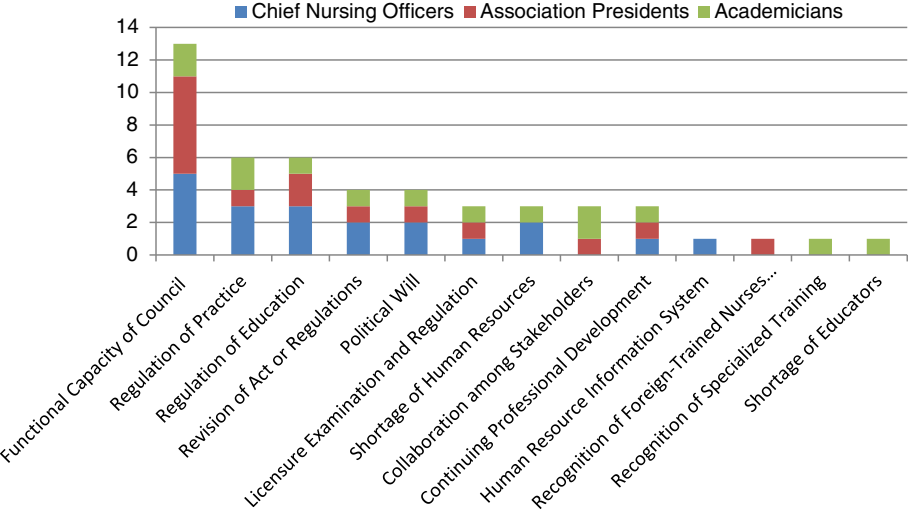

Supplement: MOESM3 [file 9569894]
